## Self-healing of hyaluronic acid to improve *in vivo* retention and function

Anna Gilpin<sup>1,2,#</sup>, Yuze Zeng<sup>2,3,#</sup>, Jiaul Hoque<sup>2</sup>, Ji Hyun Ryu<sup>2</sup>, Yong Yang<sup>2</sup>, Stefan Zauscher<sup>3</sup>,  
William Eward<sup>2</sup>, Shyni Varghese<sup>1,2,3\*</sup>

<sup>1</sup>Department of Biomedical Engineering, Pratt School of Engineering, Duke University, Durham, NC 27710

<sup>2</sup>Department of Orthopaedic Surgery, Duke University School of Medicine, Duke University, Durham, NC 27710

<sup>3</sup>Department of Mechanical Engineering and Materials Science, Duke University, Durham, NC 27710

#These authors contributed equally to this work

\*To whom Correspondence should be addressed

Email: [shyni.varghese@duke.edu](mailto:shyni.varghese@duke.edu); Tel: +1-919-660-5273

Keywords: lubrication; self-healing; cartilage; anterior cruciate ligament transection; osteoarthritis

1 **Abstract**

2 Convergent advances in the field of soft matter, macromolecular chemistry, and engineering have  
3 led to the development of biomaterials that possess autonomous, adaptive, and self-healing  
4 characteristics similar to living systems. These rationally designed biomaterials could surpass the  
5 capabilities of their parent material. Herein, we describe the modification of hyaluronic acid (HA)  
6 molecules to exhibit self-healing properties and studied its physical and biological function both  
7 *in vitro* and *in vivo*. Our *in vitro* findings showed that self-healing HA designed to undergo  
8 autonomous repair improved lubrication, enhanced free radical scavenging, and resisted enzymatic  
9 degradation compared to unmodified HA. Longitudinal imaging following intra-articular injection  
10 of self-healing HA showed improved *in vivo* retention despite the low molecular weight.  
11 Concomitant with these functions, intra-articular injection of self-healing HA mitigated anterior  
12 cruciate ligament injury-mediated cartilage degeneration in rodents. This proof-of-concept study  
13 shows how incorporation of functional properties like self-healing can be used to surpass the  
14 existing capabilities of biolubricants.

15

16

17

## 18 **Introduction**

19 Incorporating distinct molecular and chemical features into biomaterials can introduce new  
20 functionalities to combat intrinsic limitations of the parent materials towards their desired  
21 application. For example, biomaterials that can undergo *in situ* self-repair could not only improve  
22 their *in vivo* longevity and function but could also promote their therapeutic outcome. Herein, we  
23 examine whether hyaluronic acid molecules designed to undergo self-healing could improve their  
24 physical and biological functions with a focus on biolubrication. Biolubrication is critical for the  
25 efficient function of diarthrodial joints, eyes, lungs and other visceral organs. The lubricating  
26 molecules present at the articular cartilage interfaces of the diarthrodial joints maintain tissue  
27 health and tribological functions.<sup>[1]</sup> Enabling inter-surface lubrication is also important for the  
28 seamless function of various medical devices. Due to its prevalence in biolubrication and  
29 biological functions<sup>[2]</sup> and its alteration in diseases like osteoarthritis,<sup>[3]</sup> HA has been widely used  
30 to treat lubrication deficiencies.<sup>[4]</sup> Besides promoting lubrication, HA also exhibits various  
31 biological functions, such as reducing inflammation and free radical damage, as well as alleviating  
32 pain.<sup>[5]</sup> However, a persistent challenge to HA lubricants is their short *in vivo* residence time.<sup>[6]</sup>  
33 Hence, strategies that ensure long-term retention and function of exogenous HA have been  
34 developed to improve its clinical outcome.<sup>[7]</sup> One of the most widely used approaches to enhance  
35 the *in vivo* longevity of HA includes the introduction of chemical crosslinks; however, this strategy  
36 severely limits HA's lubricating function and its handling.<sup>[5a, 8]</sup> Albeit at low incidence, chemical  
37 crosslinking can also result in pseudoseptic reactions.<sup>[9]</sup>

38

39 We introduced self-healing and dynamic crosslinking into HA molecules and assessed their  
40 potential to improve the physical and biological functions of parent HA without compromising its

41 injectability. Towards this, we modified HA with ureidopyrimidinone (UPy) groups to enable self-  
42 healing of HA polymers under physiological conditions, *via* reversible secondary interactions.<sup>[10]</sup>  
43 Biomaterials modified with UPy molecules have been exploited for various biomedical  
44 applications.<sup>[11]</sup> UPy molecules rapidly dimerize through quadruple hydrogen bonding resulting in  
45 dynamic supramolecular structures under physiological conditions.<sup>[10, 12]</sup> HA molecules endowed  
46 with UPy moieties can form a dynamic network through hydrogen bonding while exhibiting shear-  
47 thinning behavior (*via* reorganization of the polymer chains in response to shear forces), thus  
48 enabling easy injection and efficient lubrication. At rest, the rapid UPy dimerization re-establishes  
49 the stable supramolecular network, and these “self-generating” networks will resist rapid clearance  
50 from the synovial space (**Fig. 1a**). Thus, the self-healing HA molecules will offer the benefits of  
51 both high molecular weight HA (shear thinning, mechanical adaptability, and enhanced  
52 lubrication), as well as chemically crosslinked HA (improved *in vivo* retention and reduced  
53 enzymatic degradation). As a proof-of-concept, we modified 200 kDa HA molecules with UPy  
54 moieties and assessed whether self-healing capability could improve the *in vivo* retention and  
55 chondroprotective function of HA in articular cartilage lubrication. We chose to use low molecular  
56 weight HA because it lacks viscoelasticity and other beneficial effects towards *in vivo* retention,  
57 thus eliminating any confounding contributions.

58

## 59 **Results and discussion**

### 60 **Synthesis and characterization of HA-UPy molecules**

61 HA-UPy molecules were prepared by functionalizing HA with UPy-bearing linkers as shown in  
62 the reaction scheme (**Fig. 1b**). Details of the UPy linker synthesis are provided in Methods and

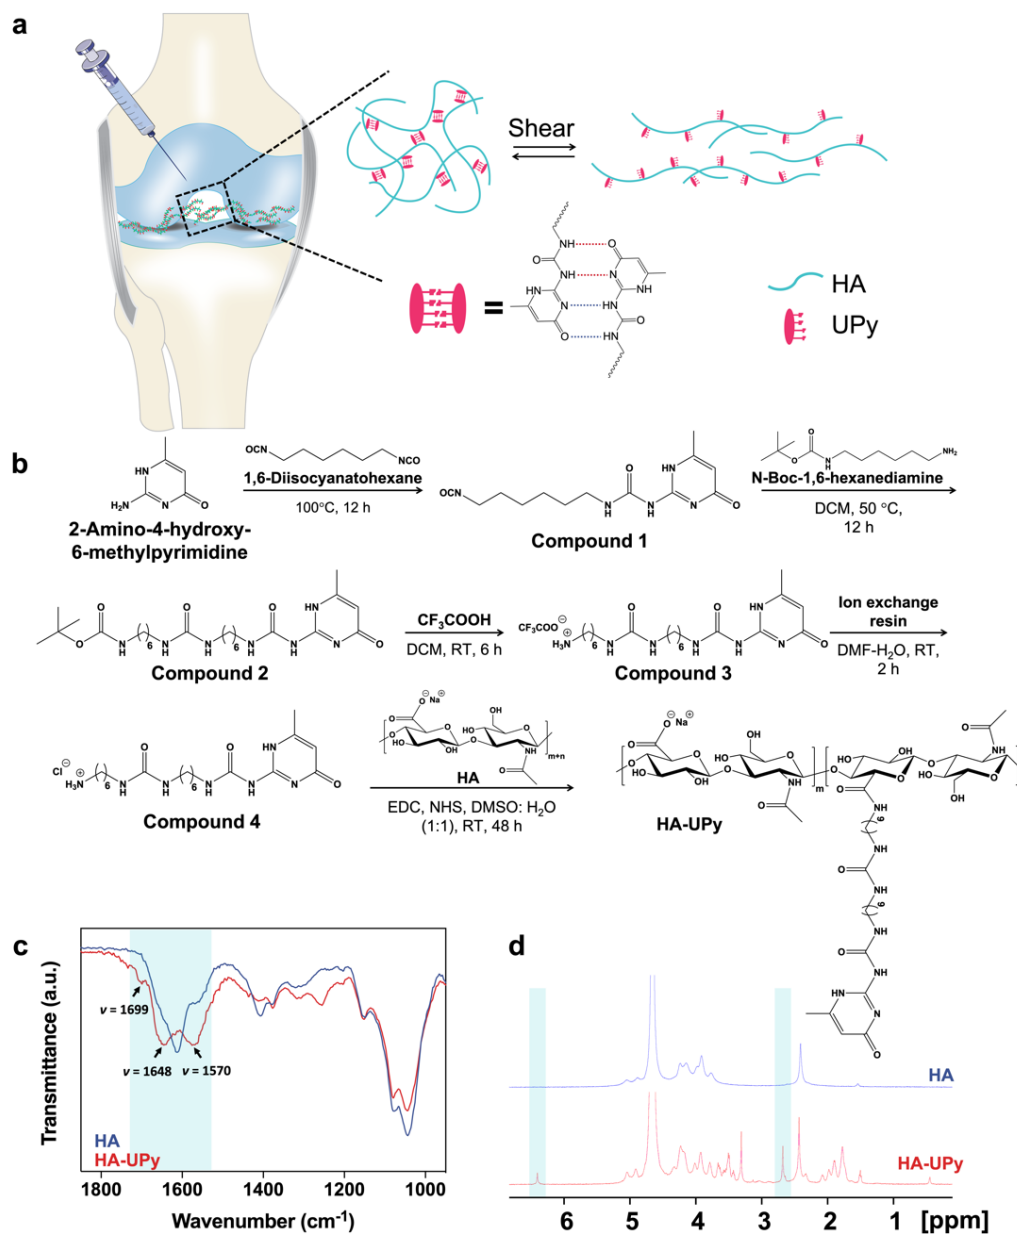

**Figure 1. Development of self-healing HA lubricant (i.e., HA-UPy).** *a*, Schematics of intra-articular injection of self-healing HA lubricant. When under shear during injection or joint movements, HA-UPy becomes fluidic and spreads in the joint, lubricating the articular surface. After the removal of shear force, HA-UPy can self-generate into a network *via* UPy-mediated hydrogen bonding, contributing to its retention in the joint. *b*, Synthesis route. DCM: dichloromethane; DMF: dimethylformamide; DMSO: dimethyl sulfoxide; EDC: 1-ethyl-3-(3-dimethylaminopropyl) carbodiimide hydrochloride; NHS: N-hydroxysuccinimide; RT: room temperature. *c*, FTIR spectra of HA and HA-UPy. *d*, <sup>1</sup>H NMR spectra. Pyrimidinone protons of UPy:  $\delta$  6.41 ppm (=CH-) and  $\delta$  2.69 ppm (-CH<sub>3</sub>).

64 Supplementary Information (**Supplementary Figs. 1-5 and Supplementary Note**). The linker  
65 was designed to bear the UPy moiety on one end<sup>[12a]</sup> with the other end containing a primary amine  
66 group protected by a cleavable tert-butyloxycarbonyl (Boc) group. Upon removal of the Boc  
67 group, the primary amine on the linker reacts with the carboxylic acid of the HA's D-glucuronic  
68 acid, resulting in UPy conjugation to HA. The Fourier-transform infrared (FTIR) spectroscopy of  
69 the product confirmed UPy conjugation with new peaks appearing at 1699, 1648, and 1570  $\text{cm}^{-1}$ ,  
70 corresponding to pyrimidinone C=O stretching, urea C=O stretching, and pyrimidinone C=N  
71 stretching, respectively (**Fig. 1c**). The UPy conjugation was further confirmed by proton nuclear  
72 magnetic resonance (<sup>1</sup>HNMR) spectroscopy (**Fig. 1d**). We estimated a grafting density of  $\sim 24 \pm$   
73 3% per dimeric repeating unit of HA from the <sup>1</sup>HNMR spectra by comparing the integrated peak  
74 area of the pyrimidinone protons in a UPy unit ( $-\text{NH}-\text{C}(\text{CH}_3)-\underline{\text{CH}}-\text{CO}-$ , 1H,  $\delta$  6.41;  
75  $-\text{NH}-\text{C}(\underline{\text{CH}_3})-\text{CH}-\text{CO}-$ , 3H,  $\delta$  2.69) to that of the acetyl protons in HA's N-acetyl-D-  
76 glucosamine unit ( $-\text{NH}-\text{CO}-\underline{\text{CH}_3}$ , 3H,  $\delta$  2.45) (**Fig. 1d and Supplementary Fig. 6**). For live *in*  
77 *vivo* imaging (IVIS), HA and HA-UPy molecules were conjugated with the near infrared (NIR)  
78 fluorescent dye cyanine 7 (Cy7) (**Supplementary Fig. 7**).

79

## 80 **HA-UPy molecules form supramolecular networks and exhibit self-healing**

81 The UPy-mediated non-covalent interactions among the polymer chains can facilitate self-  
82 assembly of HA molecules into dynamic networks (*i.e.*, soft gels), which we characterized by  
83 rheological measurements. To study the effect of polymer concentration, we prepared solutions of  
84 HA-UPy and HA at three concentrations (2, 5, and 10 wt%) in phosphate-buffered saline (PBS).  
85 The frequency sweep (0.1–10 Hz) measurements of HA-UPy and unmodified HA showed that  
86 HA-UPy samples exhibit higher G' (storage modulus) and G'' (loss modulus) at all frequencies

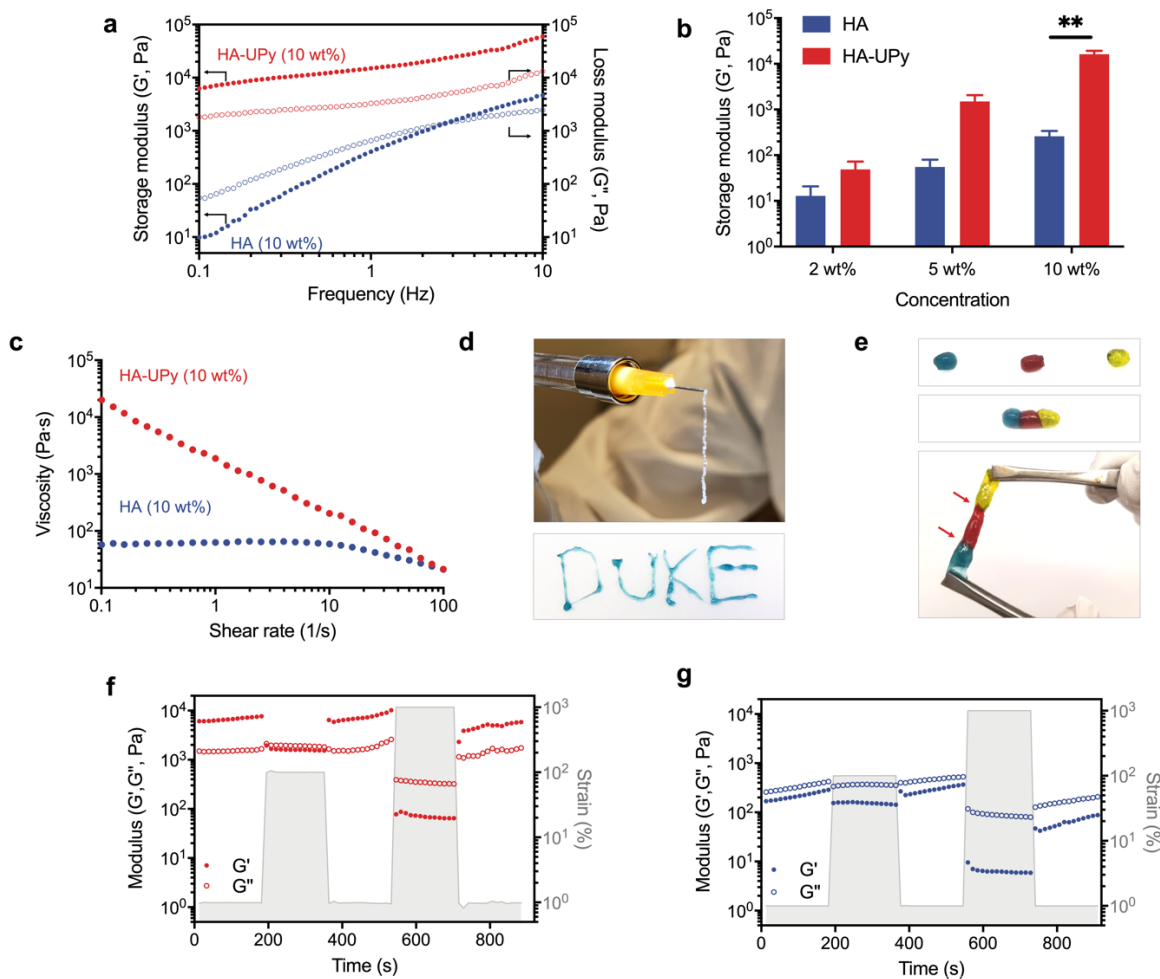

**Figure 2. Characterization of self-healing HA.** *a*, Storage ( $G'$ ) and loss ( $G''$ ) moduli of HA-UPy and HA in a frequency sweep measurement. *b*, Storage modulus ( $G'$ ) of HA-UPy and HA as a function of concentration. *c*, Viscosity changes of HA-UPy and HA as a function of shear rate. *d*, HA-UPy (10 wt%) was easily extruded through a 26G needle into “DUKE” letters. *e*, Separate pieces of HA-UPy (10 wt%) hydrogels healed together with interfaces indicated with red arrows. *f,g*, Step-strain measurements for 10 wt% HA-UPy (*f*) and 10 wt% HA (*g*).

87 while the HA samples behaved more like a viscous liquid<sup>[13]</sup> (**Fig. 2a and Supplementary Figs.**  
 88 **8a, b**). Furthermore, the storage modulus, determined at 1 Hz, of the HA-UPy samples increased  
 89 with increasing concentration (**Fig. 2b**). The oscillation frequency of 1 Hz was chosen because it  
 90 is within the range of typical walking frequencies.<sup>[14]</sup> The concentration-dependent network

91 formation was also visualized by inverting the tubes containing the polymer solutions. The samples  
92 containing HA-UPy showed solid-like behavior at higher concentrations and did not flow like a  
93 liquid. In contrast, the samples containing unmodified HA behaved like a viscous liquid at all  
94 concentrations, with the 10 wt% solution taking a longer time to flow (**Supplementary Fig. 8c**).  
95 These observations for the HA-UPy samples are consistent with network formation, which arises  
96 from quadruple hydrogen bonding between the UPy moieties. Further experiments were carried  
97 out using 10 wt% HA and HA-UPy.

98

99 Because the UPy-mediated network formation is dynamic, the HA-UPy samples should show  
100 shear-thinning and self-healing functions. As expected, the viscosity of the HA-UPy samples  
101 decreased with increasing shear rate, showing a characteristic shear-thinning behavior which  
102 results from the destruction of the physical crosslinks by the applied shear stresses (**Fig. 2c**). In  
103 contrast, the shear rate-dependent viscosity of the corresponding HA solution is consistent with  
104 that of a viscous liquid. The HA-UPy samples (10 wt%) were easily injected, with minimal  
105 resistance, through a 26G hypodermic needle (**Fig. 2d**). The extruded HA-UPy formed a stable  
106 network at rest, which enabled the “printing” of different shapes (**Fig. 2d**).

107

108 We examined the self-healing of HA-UPy, following an approach reported previously,<sup>[15]</sup> by  
109 bringing multiple pieces of HA-UPy hydrogels into close contact, which showed instantaneous  
110 healing (**Fig. 2e**). Furthermore, we used step-strain measurements to confirm the UPy-mediated  
111 self-healing of HA-UPy and dynamic networks, wherein 10 wt% HA-UPy and HA samples were  
112 subjected to alternating step strains of 1 to 100% and 1 to 1000% (**Figs. 2f, g**). The storage modulus  
113 ( $G'$ ) values of the HA-UPy samples dropped to that of the loss modulus ( $G''$ ) at a strain  $\gamma = 100\%$ ,



114 indicating network disruption (**Fig. 2f**). When the strain was removed, the HA-UPy molecules re-  
115 organized and formed a new network structure instantaneously with a 100% recovery of  $G'$ .  
116 Increasing the strain rate to 1000% induced more network destruction as indicated by the drop of  
117 the storage modulus to  $\sim 100$  Pa, with a corresponding inversion of  $G'$  and  $G''$ , suggesting liquid-  
118 like flow behavior. Despite the large strain ( $\gamma = 1000\%$ ), prompt recovery of the network structure  
119 was observed upon the removal of the strain. Unmodified HA samples, on the other hand, had a  
120 higher loss modulus than storage modulus at both low and high strains (**Fig. 2g**). This behavior is  
121 indicative of a viscous liquid. Additionally, we performed experiments where we alternately  
122 applied a low (1%) and high (500%) strain over multiple cycles to determine whether the HA-UPy  
123 sample would recover its storage modulus after repeated network disruptions. These studies  
124 showed complete network formation without hysteresis as indicated by the  $G'$ , which maintained  
125 its original value at 1% strain following repeated network disruption at  $\gamma = 500\%$  (**Supplementary**  
126 **Fig. 9**).

127

### 128 **Self-healing HA exhibits enhanced lubrication**

129 Effectiveness of the biolubricant to reduce friction between the articular surfaces is key to its  
130 application in improving joint function. We thus investigated whether UPy-mediated changes in  
131 the viscoelastic properties of HA-UPy would translate to its lubrication function. To this end, we  
132 determined the coefficient of friction ( $\mu$ ) between healthy porcine cartilage explants in the presence  
133 of HA-UPy and compared the measured values with those obtained when using corresponding HA  
134 solutions and saline (negative control) by using a rotational rheometer. We determined the  
135 coefficient of friction (COF),  $\mu$ , at the cartilage-to-cartilage interface, using the equation,  $\mu =$

136  $\frac{\text{Shear stress}}{\text{Normal stress}}$ . **Figure 3a** shows that the COF between the contacting articular surfaces decreased

137 significantly in the presence of HA-UPy. Specifically, the HA-UPy molecules reduced friction by  
138 ~70% and 55% compared to saline and HA molecules, respectively.

139

#### 140 **Self-healing HA promotes free radical scavenging**

141 HA has a number of biological functions, including serving as an antioxidant to reduce free radical  
142 damage to cells. We investigated the free radical scavenging effect of HA-UPy using  
143 deoxyribose/Fenton reagent and 1,1-diphenyl-2-picrylhydrazyl (DPPH) assays.<sup>[16]</sup> In the  
144 deoxyribose/Fenton reagent assay, hydroxyl radicals are produced by the reaction of  $\text{Fe}^{2+}$ -EDTA  
145 with hydrogen peroxide. The hydroxyl radicals subsequently interact with deoxyribose and form  
146 a pink color chromogen with thiobarbituric acid upon heating. Following incubation with the  
147 Fenton reagent, the absorbance of the solution was measured. As seen in **Figure 3b**, the solution  
148 incubated with HA-UPy had a lower chromogen absorbance, corresponding to fewer hydroxyl  
149 radicals, suggesting free radical scavenging by HA-UPy molecules. Since free radicals cleave the  
150 glycosidic bonds in HA which could lead to the breakdown of polymer chains, we examined the  
151 storage moduli of the HA-UPy exposed to the Fenton reagent and compared them to the storage  
152 moduli of untreated HA-UPy samples. **Figure 3c** shows a slight reduction in the  $G'$  value,  
153 indicating some disruption of the network in the presence of free radicals (**Supplementary Fig.**  
154 **10**). Although we stopped the reaction after 1 h, ensuring the complete removal of free radicals  
155 from the solution is challenging. It is thus likely that free radicals continued to react with HA-UPy  
156 molecules. While the Fenton assay enables us to examine the free radical scavenging effect of the  
157 HA-UPy in a physiologically relevant environment, a potential radical scavenging property of  
158 unmodified HA molecules cannot be determined because of the aqueous reaction environment.

159

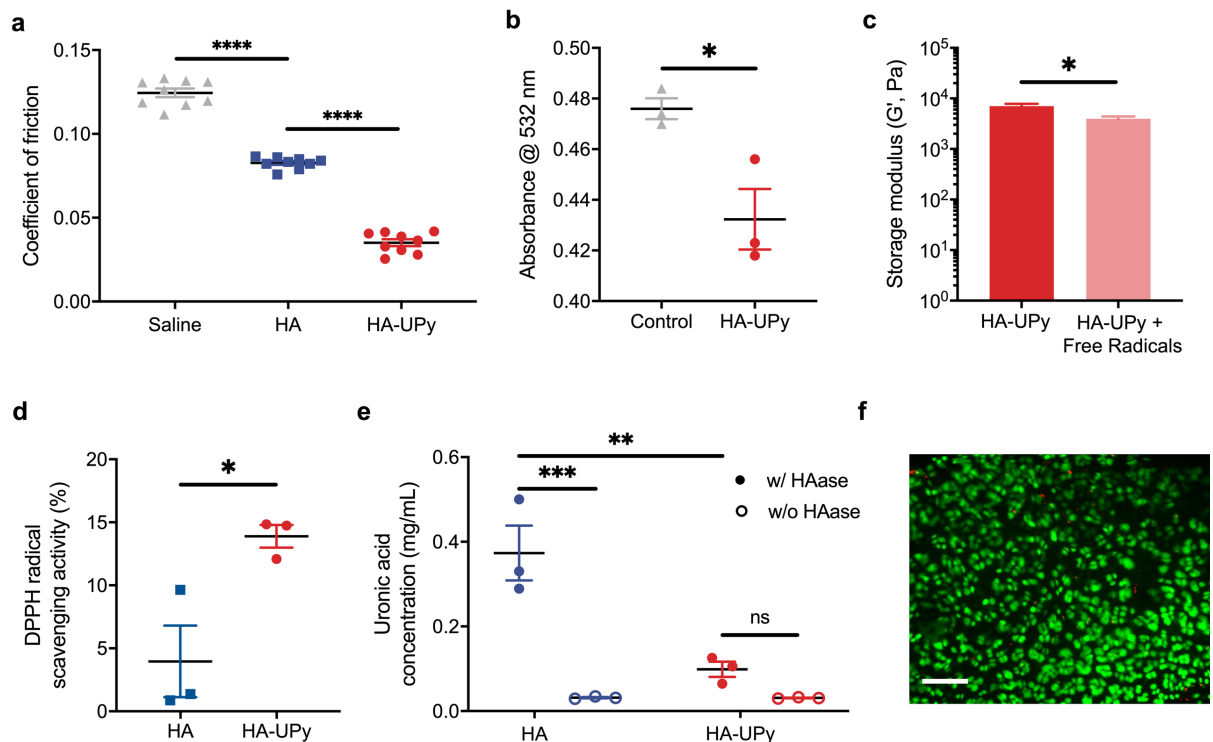

**Figure 3. Lubrication, antiradical capacity, *in vitro* stability, and cytocompatibility of self-healing HA.** *a*, Coefficients of friction at the cartilage-cartilage interface in the presence of HA-UPy, HA, and saline. *b*, Free radical scavenging effect of HA-UPy exposed to Fenton reagent compared to the phosphate buffer control. *c*, Storage modulus ( $G'$ ) of HA-UPy measured at a frequency of 1 Hz following exposure to hydroxyl radicals compared to non-exposed HA-UPy. *d*, DPPH radical scavenging of HA-UPy compared to HA. *e*, Degradation products of HA-UPy and HA with and without the presence of hyaluronidase (HAase). *f*, Chondrocyte viability in a rat cartilage explant after 7 d incubation with HA-UPy. Green: live cells; Red: dead cells. Scale bar: 100 μm. All data are presented as means ( $\pm$  s.e.m.). One-way ANOVA (*a*), unpaired two-tailed t-test (*b*, *c*, *d*) or two-way ANOVA (*e*) with Tukey's multiple-comparisons test was used for statistical analysis. Significance is determined as  $*P < 0.05$ ,  $**P < 0.01$ ,  $***P < 0.001$ ,  $****P < 0.0001$  and n.s. (not significant).

160 Hence, we also used a DPPH assay to examine the UPy-mediated changes in free radical  
 161 scavenging, where the samples were exposed to a DPPH solution in ethanol. The solution  
 162 containing HA-UPy molecules showed a significantly reduced DPPH free radical concentration as  
 163 compared to that containing HA, which had a minimal scavenging effect (**Fig. 3d**). The free

164 radical scavenging ability of HA-UPy could be due to the network formation and/or the presence  
165 of UPy moieties. Prior studies have showed that the protective effect of HA against the free radical  
166 damage to the cells depends on HA molecular weight, with high molecular weight HA providing  
167 better protection.<sup>[17]</sup> Furthermore, UPy moieties contain pyrimidine rings, which are known to  
168 scavenge free radicals.<sup>[18]</sup> The minimal reduction in  $G'$  of HA-UPy following free radical exposure  
169 could be attributed to the UPy-mediated self-healing/self-generation of networks or by the UPy  
170 scavenging the free radical itself.

171

### 172 **Self-healing HA molecules resist enzymatic degradation**

173 HA within the synovial fluid is subjected to enzymatic and free radical degradation as well as  
174 lymphatic drainage, which are some of the key players contributing to its rapid clearance in the  
175 joint. The short residence time ( $t_{1/2} \sim 24$  h) of HA within the synovial joint<sup>[19]</sup> has been thought to  
176 be one of the factors contributing to its limited clinical effectiveness following intraarticular  
177 injection, and chemically crosslinked HA derivatives have thus been generated to delay or slow  
178 the breakdown.<sup>[5a, 20]</sup> We posit that the formation of supramolecular HA networks by UPy  
179 interactions may also slow the degradation of HA molecules. To test this, we incubated HA-UPy  
180 with hyaluronidase and quantified the resultant HA fragments by using a modified uronic acid  
181 assay.<sup>[21]</sup> As demonstrated by the results, the HA-UPy experienced minimal degradation compared  
182 to the corresponding HA in the presence of hyaluronidase. Moreover, no statistical significance is  
183 observed between HA-UPy incubated with hyaluronidase and controls (*i.e.*, HA and HA-UPy in  
184 the absence of hyaluronidase) (**Fig. 3e**). The diminished degradation of HA-UPy is likely due to  
185 the UPy-mediated network formation, which could shield the enzyme-specific binding sites from  
186 hyaluronidase.<sup>[21]</sup>

187

188 Given the direct contact between HA-UPy and the cartilage surface, we also evaluated the  
189 cytocompatibility of HA-UPy by exposing rat cartilage explants to HA-UPy for a duration of 7  
190 days. The live/dead analyses showed that nearly 100% of the chondrocytes were alive with no  
191 detrimental effect (**Fig. 3f**).

192

### 193 **Self-healing improved the *in vivo* retention of HA**

194 The *in vivo* retention of HA-UPy following intraarticular injection was studied as a function of  
195 time by live imaging of rat knees and compared against corresponding HA. Cy7-conjugated HA-  
196 UPy and HA molecules were injected into rat knees and monitored using IVIS for 28 days. We  
197 performed calibration studies to ensure that both cohorts received similar levels of Cy7 molecules.  
198 The animals were imaged immediately and 24 h post-injection for the initial reading, which  
199 showed clear positive signals from the joints administered with the HA-UPy and HA molecules.  
200 Longitudinal imaging indicated that a majority (>60%) of the HA was cleared from the joint by  
201 ~3 d (**Figs. 4a, b**). In contrast, strong positive signals were present in the HA-UPy group even at  
202 28 d, the maximum experimental time point, with a ~40% reduction in fluorescence intensity  
203 compared to the initial reading (*i.e.*, immediately after administration) (**Fig. 4b**). The values are  
204 presented as a percentage of initial fluorescence intensity to account for variability among the  
205 animals.

206

207 The effect of injury on lubricant clearance was examined by comparing the retention of HA-UPy  
208 in rat joints which underwent minimally invasive anterior cruciate ligament transection (mi-  
209 ACLT), where the HA-UPy molecules were administered two days post-mi-ACLT. Similar to the

210

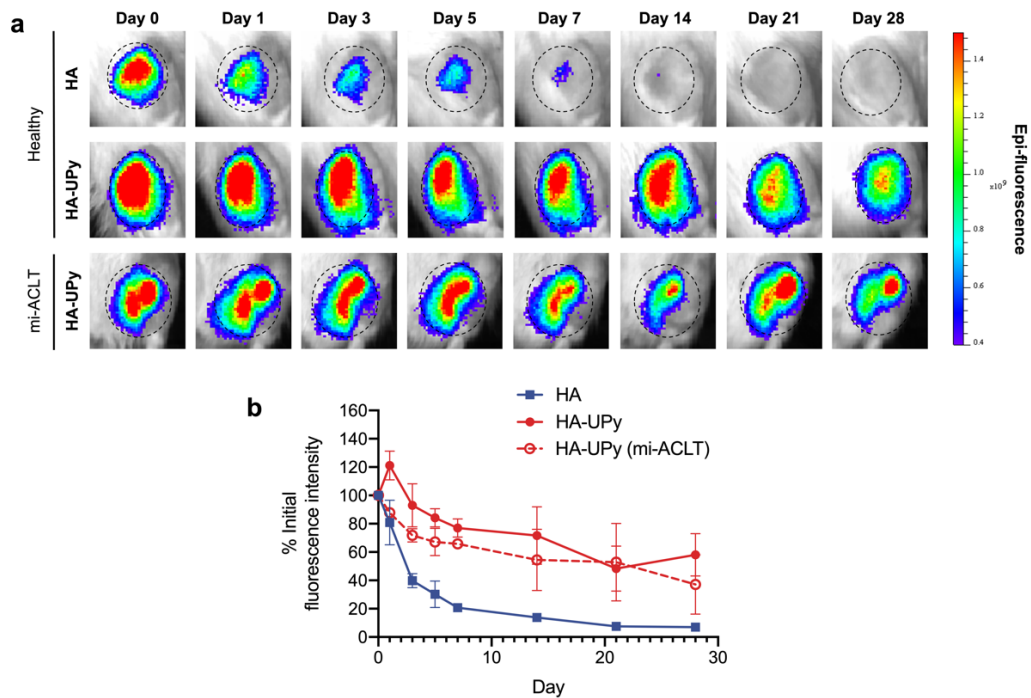

**Figure 4. *In vivo* retention of self-healing HA.** *a*, Representative IVIS images of rat knee joints following intra-articular injection of Cy7-tagged HA or HA-UPy as a function of time. Dashed circles demarcate the joint region of interest (ROI) that was used for fluorescence intensity quantification. Color map reflects the epi-fluorescence intensity with red being the strongest. *b*, Quantification of fluorescence intensity of ROI as a percentage of initial intensity. HA: n=2, HA-UPy: n=3, HA-UPy (mi-ACLT): n=2. Data are presented as means ( $\pm$  s.e.m.).

211 healthy group, a significant amount of the administered HA-UPy was retained within the mi-ACLT  
212 joints, albeit less than that in the uninjured joints. Given that a molecular weight of 200 kDa is  
213 well below the permeability barrier of the synovial membrane,<sup>[22]</sup> we attribute the increased  
214 residence time of HA-UPy within the joint synovial space to self-healing of HA molecules.

215

216 **Self-healing HA provides improved chondroprotection**

217 The enhanced lubrication along with its improved retention in the joint suggests that the self-  
218 healing HA-UPy could offer chondroprotection following joint injury. To assess the *in vivo*  
219 chondroprotective function, we have used mouse and rat ACL transection models. The surgical  
220 ACL transection model is widely used to represent articular cartilage degeneration consistent with  
221 ACL injuries, which cause joint instability, chronic inflammation, and degeneration.<sup>[23]</sup> The ACL-  
222 transected mice received weekly intraarticular injections of HA-UPy, HA, or saline for four weeks  
223 beginning one week post-surgery as shown in the experimental timeline (**Supplementary Fig.**  
224 **11a**). Weekly injections were chosen based on prior reports<sup>[24]</sup> and *in vivo* imaging which showed  
225 complete clearance of HA by day 7. Safranin O staining of the knee joints at week 5 showed  
226 significant damage to the articular surfaces of the cohorts that received saline (**Supplementary**  
227 **Fig. 11b**). Similar to the saline group, the animals that received HA injections showed significant  
228 cartilage degeneration. In contrast, the cohort that received HA-UPy maintained better cartilage  
229 integrity with significant positive staining for glycosaminoglycans. We used a semi-quantitative  
230 score of cartilage degeneration (OARSI) to assess the matrix loss, surface fibrillation, and erosion  
231 in the joint, which corroborated the histological findings (**Supplementary Fig. 11c**). The lower  
232 scoring value for the animals that received HA-UPy suggests improved chondroprotective function  
233 of the parent HA following modification (i.e., HA-UPy).

234

235 Because mouse joints only permit intraarticular injections of small volumes (~5  $\mu$ L), we employed  
236 a rat knee injury model to determine the chondroprotection of self-healing HA-UPy. By using a  
237 minimally invasive, percutaneous procedure, we have developed an ACL injury (mi-ACLT) in the  
238 rat knee without surgically opening the joint. Specifically, the ACL was transected with an 18G  
239 needle which was inserted into the knee joint lateral to the patellar ligament while the knee was

240 flexed at a  $\sim 120^\circ$  angle (**Supplementary Fig. 12a**). Successful ACL rupture was confirmed by  
241 using the anterior drawer test, which exhibited abnormal subluxation of the tibia. The dissected  
242 knee joints post-mortem showed that the ACL had been successfully transected (**Supplementary**  
243 **Fig. 12b**). The mi-ACLT-mediated cartilage degeneration was assessed at week 9 following  
244 weekly saline injections over eight weeks. Safranin O/Fast Green staining of sagittal sections of  
245 the articular joints showed severe fibrillation and erosion of both the tibial and femoral cartilage  
246 (**Supplementary Fig. 12c**). The formation of osteophytes was also visible on the posterior region  
247 of the tibia. In contrast, the cartilage surfaces of the uninjured contralateral limbs were smooth  
248 with no significant degeneration, and no osteophytes were present. The degree of degeneration  
249 was quantified using the rat OARSI score,<sup>[25]</sup> which showed that the mi-ACLT group had a  
250 significantly higher score than that of the unoperated control, consistent with greater cartilage  
251 degeneration (**Supplementary Fig. 12d**).

252

253 The extent of cartilage degeneration was further examined by immunohistochemical (IHC)  
254 staining for catabolic markers— matrix metalloproteinase-13 (MMP-13) and a disintegrin and  
255 metalloproteinase with thrombospondin motifs 5 (ADAMTS-5), which are shown to be highly  
256 active during cartilage degeneration.<sup>[26]</sup> Cartilage in the mi-ACLT group showed a higher  
257 expression of both ADAMTS-5 and MMP-13 than the contralateral group, indicating greater  
258 degeneration (**Supplementary Fig. 12e**). Furthermore, clustering of the chondrocytes, a hallmark  
259 of osteoarthritic cartilage,<sup>[27]</sup> was clearly present in the mi-ACLT group but not in the healthy  
260 contralateral group. In addition to the semi-quantitative scoring (OARSI score), total cartilage  
261 degeneration (matrix, proteoglycan, or chondrocyte loss), significant cartilage degeneration  
262 (degeneration  $>50\%$  of cartilage thickness), surface matrix loss (matrix fibrillation), and the depth



263 ratio of cartilage lesions (ratio of depth of cartilage degeneration to total cartilage thickness,  
264 measured at three zones) were quantified as described elsewhere.<sup>[25]</sup> In addition to the tibia (which  
265 is commonly the focus for rat OARSI scoring), the femur was also analyzed, as recent studies have  
266 shown that the medial femoral condyle exhibits severe degeneration with ACL injury, both in  
267 animals<sup>[28]</sup> and humans.<sup>[29]</sup> The mi-ACLT was shown to significantly increase total degeneration  
268 (**Supplementary Fig. 12f**), significant cartilage degeneration (**Supplementary Fig. 12g**), surface  
269 matrix loss (**Supplementary Fig. 12h**), and depth ratio of cartilage lesions (**Supplementary Fig.**  
270 **12i**) as compared to the healthy contralateral group. Together the data demonstrate significant  
271 cartilage degeneration following mi-ACLT.

272

273 We next examined the chondroprotective function of self-healing HA in the rat mi-ACLT model.  
274 Because the HA- and saline-treated animals exhibited similar cartilage degeneration, we have  
275 compared the HA-UPy-treated rat joints to those treated with corresponding HA. As described in  
276 **Fig. 5a**, the animals received weekly injections starting one day post-mi-ACLT for a total of eight  
277 weeks. At week 9, animals were euthanized, and their joints were examined histologically. The  
278 cohorts treated with HA showed significant cartilage degeneration compared to those treated with  
279 HA-UPy. Specifically, cartilage erosion, proteoglycan loss, and osteophytes in the tibia were  
280 clearly observed in the HA group and were similar to features observed in the saline group (**Fig.**  
281 **5b**). On the contrary, joints treated with HA-UPy showed higher Safranin O staining intensity with  
282 minimal cartilage thinning but displayed some degree of cartilage fibrillation and osteophyte  
283 formation. In comparing the OARSI scores, HA-UPy, while higher than the contralateral group,  
284 had a significantly lower score than the corresponding HA group (**Fig. 5c**).

285

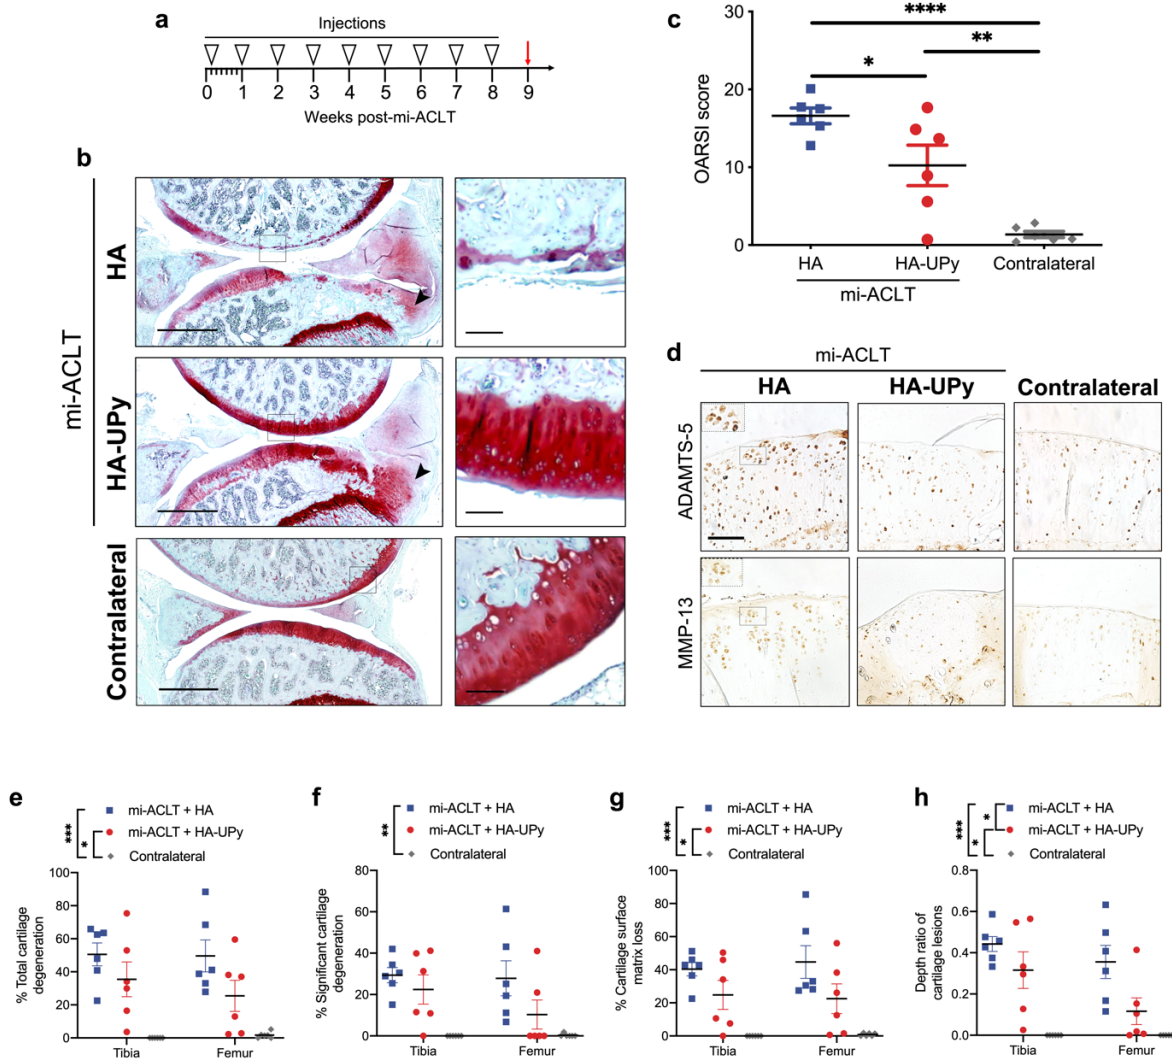

**Figure 5. Chondroprotection of self-healing HA in a minimally invasive rat ACLT model.**

**a**, Experimental timeline showing schedule of injections. **b**, Safranin O-stained mi-ACLT joint treated with HA showed severe cartilage degeneration with an osteophyte in the tibia (arrow). HA-UPy-injected joints showed strong proteoglycan staining while exhibiting some cartilage fibrillation and osteophyte formation (arrow). Contralateral joints without injury were used as a positive control. Scale bar: 1 mm. **c**, OARSI scoring indicates that the HA-UPy group had significantly less HA degeneration than the unmodified HA group. Data are presented as means ( $\pm$  s.e.m.) and statistical significance was analyzed using one-way ANOVA with Tukey's multiple comparisons test. **d**, ADAMTS-5 and MMP-13 IHC staining of tibial cartilage. Greater positive staining and chondrocyte clustering (inset) is observed in the HA group compared to the HA-UPy group. Scale bar: 100  $\mu$ m. **e-h**, Quantitative measures of **(e)** total cartilage degeneration, **(f)** significant cartilage degeneration, **(g)** cartilage surface matrix loss, and **(h)** thickness of cartilage lesions for both the tibia and femur. Data are presented as means ( $\pm$  s.e.m.). A two-way repeated measures ANOVA was used to analyze statistical significance with Tukey's multiple comparisons used to analyze the differences between treatments. The significance in the legend shows the Tukey's multiple comparisons between treatments. Significance is determined as \* $P$  < 0.05, \*\* $P$  < 0.01, and \*\*\* $P$  < 0.001.

287 Furthermore, MMP-13 and ADAMTS-5 IHC staining showed higher expression of these catabolic  
288 enzymes in the HA group, as seen by greater staining (both in intensity and the number of stained  
289 cells), compared to the HA-UPy and contralateral groups (**Fig. 5d**). Furthermore, the joints treated  
290 with HA showed evidence of chondrocyte clustering, similar to those treated with saline. A  
291 majority of the HA-UPy-treated joints showed minimal cartilage degeneration, and no chondrocyte  
292 clustering was observed in these animals similar to the unoperated contralateral groups. Moreover,  
293 the organization and distribution of chondrocytes within the cartilage of cohorts treated with the  
294 HA-UPy molecules was found to be similar to that of the uninjured contralateral groups. We also  
295 quantitatively assessed the total cartilage degeneration, significant cartilage degeneration, surface  
296 matrix loss, and the depth ratio of cartilage lesions. These parameters were lower in the HA-UPy  
297 group than the HA group for both the femur and tibia (**Figs. 5e-h**). Despite the high variability  
298 among the treated animals, the total tibial degeneration was ~30% less in animals treated with HA-  
299 UPy compared to those treated with HA (as a percentage of total cartilage width:  $35\pm 10\%$  for HA-  
300 UPy vs.  $51\pm 7\%$  for HA). Similarly, joints treated with HA-UPy displayed half as much total  
301 cartilage degeneration in the femur (as a percentage of total cartilage width:  $25\pm 9\%$  for HA-UPy  
302 vs.  $50\pm 10\%$  for HA) compared to those treated with HA. The HA-UPy group also showed a  
303 reduced amount of significant cartilage degeneration, which consists of the width of cartilage in  
304 which 50% or more of the cartilage thickness is degenerated. The cartilage lesions in the HA-UPy  
305 group also spanned significantly less of the cartilage thickness as compared to those in the HA  
306 group were also significantly less deep than the HA group, indicating that self-healing HA was  
307 more chondroprotective than unmodified HA. The high variability observed in the HA-UPy-  
308 treated group could be attributed to the presence of minimally modified or unmodified HA  
309 molecules. It is also likely that the high variability is due to differences in the initial cartilage

310 damage that may result from the needle during the mi-ACLT procedure. Because the injury is  
311 performed on a closed knee, there is risk of unintentionally damaging the cartilage or other joint  
312 tissues, increasing the severity of the injury. While the potential for this variability is high, we have  
313 randomized the animals to each treatment to ensure that differences due to the mi-ACLT procedure  
314 are spread amongst groups.

315

## 316 **Conclusion**

317 Taken together, our results show that endowing HA with self-healing functionality can be used to  
318 improve the intraarticular longevity of HA. Introduction of self-healing moieties not only  
319 improved the residence time and lubrication properties of HA, but also endowed the precursors  
320 with biological functions otherwise lacking. In particular, self-healing HA showed improved  
321 viscoelastic properties without compromising its injectability. These modified HA molecules also  
322 exhibited enhanced free radical scavenging and diminished enzymatic degradation. Moreover,  
323 intraarticular administration of self-healing HA can be used to slow the progression of cartilage  
324 degeneration after trauma. In this proof-of-concept study, we used low molecular weight (200  
325 kDa) HA as the precursor, which was necessary to limit the confounding contributions arising  
326 from high molecular weight HA. Having demonstrated the promising beneficial effect of self-  
327 healing HA, future studies will include self-healing HA generated from high molecular weight HA  
328 precursors in a larger animal model. Our approach of using molecular engineering to imbue  
329 biomaterials with self-healing could serve as a guide for engineering self-regenerating biomaterials  
330 and lubricants with greater efficacy and therapeutic outcome.

331

332

## 333 **Methods**

334 **Synthesis of UPy-bearing linker:** UPy-bearing linkers were synthesized *via* a multi-step  
335 process.<sup>[11a, 30]</sup> Briefly, 2-amino-4-hydroxy-6-methylpyrimidine (Sigma, Cat.# A58003) (10 g,  
336 0.08 mol) was dissolved in excess 1,6-diisocyanatohexane (Sigma, Cat.# 52650) (107 g, 0.64 mol)  
337 and reacted at 100°C overnight in argon environment. The product, termed as compound **1** — 1-  
338 (6-isocyanatohexyl)-3-(6-methyl-4-oxo-1,4-dihydropyrimidin-2-yl) urea in Fig. 1b, was  
339 precipitated in n-pentane, filtered, and dried. The product was characterized by using NMR and  
340 FTIR (**Supplementary Figs. 1 and 5**). Compound **1** (5 g, 0.017 mol) was mixed with *N*-*boc*-1,6-  
341 hexanediamine (TCI Chemicals, Cat.# A1375) (5.5 g, 0.025 mol) in anhydrous dichloromethane  
342 (~75 mL) and kept at 50°C overnight to yield compound **2** (tert-butyl(6-(3-(6-(3-(6-methyl-4-oxo-  
343 1,4-dihydropyrimidin-2-yl)ureido)hexyl) ureido)hexyl)carbamate), which was precipitated in  
344 chilled diethyl ether, filtered, and dried. NMR and FTIR spectra are provided in supplementary  
345 information (**Supplementary Figs. 2 and 5**). Compound **2** (5 g) was dispersed in dichloromethane  
346 (90 mL). Trifluoroacetic acid (TCI Chemicals, Cat.# A12198) (10 mL) was added to the  
347 suspension and stirred vigorously at room temperature for ~6 h. Following the reaction, the  
348 dichloromethane and trifluoroacetic acid were removed using a rotavapor. The solid residue was  
349 dissolved in minimum amount of dichloromethane and precipitated in excess chilled acetone. The  
350 product, compound **3**, (1-(6-(3-(6-aminohexyl)ureido)hexyl)-3-(6-methyl-4-oxo-1,4-  
351 dihydropyrimidin-2-yl)urea·trifluoroacetic acid) was filtered, washed repeatedly with acetone and  
352 dried in vacuum. The product was characterized by NMR and FTIR analyses (**Supplementary**  
353 **Figs. 3 and 5**). The dried compound **3** was treated with Amberlite IRA 400 chloride ion exchange  
354 resin (Sigma, Cat.# 247669) in dimethylsulfoxide-water mixture (1:1) at room temperature for 2  
355 h. The resin was filtered off and the solution of the UPy-bearing linker (compound **4**, 1-(6-(3-(6-

356 aminohexyl)ureido)hexyl)-3-(6-methyl-4-oxo-1,4-dihydropyrimidin -2-yl)urea·HCl) was used to  
357 react with HA. The product was characterized by NMR and FTIR spectra (**Supplementary Figs.**  
358 **4 and 5**).

359  
360 **Synthesis of HA-UPy:** To synthesize HA-UPy, UPy-bearing linker was reacted with sodium  
361 hyaluronate (HA, MW 200 kDa or 1MDa; Lifecore Biomedical, Cat# HA200K) using EDC/NHS  
362 chemistry. Briefly, HA was dissolved in a mixture of deionized water and DMSO (1:1) at 5  
363 mg/mL, to which 1-ethyl-3-(3-dimethylaminopropyl)carbodiimide hydrochloride (EDC, TCI  
364 Chemicals, Cat.# D1601), *N*-hydroxysuccinimide (NHS, Sigma, Cat.# 130672), and compound **4**  
365 (each 1 equivalent with respect to the carboxylic acid groups of HA) were sequentially added at  
366 15 min intervals. The reaction was carried out at room temperature for 48 h, and the resulting HA-  
367 UPy product was purified *via* dialysis against water and lyophilized. Successful conjugation of  
368 UPy to HA was verified by a combination of FTIR and NMR spectroscopy, and the extent of UPy  
369 conjugation was quantified *via* <sup>1</sup>HNMR spectroscopy.

370  
371 **Synthesis of HA-Cy 7 and HA-UPy-Cy7:** Cyanine 7 (Cy7, Lumiprobe, Cat.# 550C0) dye was  
372 conjugated onto HA and HA-UPy *via* amide coupling reaction. Briefly, HA or HA-UPy was  
373 dissolved in a mixture of deionized water and DMSO (1:1) at 5 mg/mL. EDC (1 equivalent with  
374 respect to the carboxylic acid group of HA or HA-UPy), NHS (1 equivalent with respect to the  
375 carboxylic acid group of HA or HA-UPy), and Cy7 (0.04 equivalent with respect to the carboxylic  
376 acid group of HA or HA-UPy) were subsequently added to the polymer solution. After 48 h of  
377 reaction at room temperature, the mixture was dialyzed extensively with water for 4 d. The  
378 solutions were then freeze-dried to obtain HA-Cy7 or HA-UPy-Cy7. The product was

379 characterized by a combination of FTIR and NMR spectroscopy, and the extent of dye conjugation  
380 was quantified *via* UV/vis absorption spectroscopy.

381

382 ***Fourier transform infrared (FTIR) and nuclear magnetic resonance (<sup>1</sup>HNMR) spectroscopy:***

383 FTIR spectrometer (Nicolet 8700) with an attenuated total reflection (ATR) range of 4000 to 650  
384 cm<sup>-1</sup> was used for all characterization. For <sup>1</sup>HNMR measurements, the products were dissolved in  
385 heavy water (~1 wt%), and the spectra were recorded by using a 500 MHz Agilent/Varian VNMRS  
386 spectrometer at either room temperature or 80°C.

387

388 ***Gelation of HA and HA-UPy molecules:*** HA and HA-UPy solutions of various concentrations (2

389 wt%, 5 wt%, and 10 wt%) were prepared by dissolving the required weight of the molecules in  
390 phosphate-buffered saline (PBS). For visualizing gelation, food dye was added. Eppendorf tubes  
391 containing the solutions were inverted to visualize the flow under gravity, and images were taken  
392 both immediately following dissolution and after 24 h.

393

394 ***Rheological analysis:*** Both HA-UPy and HA were prepared in PBS and subjected to rheological

395 measurements as a function of concentration by using a rotational rheometer (AR-G2, TA  
396 Instruments). Each sample was loaded on a parallel plate geometry (A1, diameter 8 mm), and the  
397 oscillatory frequency sweep measurements were conducted at 1% strain amplitude with  
398 frequencies ranging from 0.1 to 10 Hz. To assess the shear-thinning behavior, the steady-state  
399 viscosities of HA-UPy and HA at 10 wt% were measured at 1% strain as a function of shear rate  
400 (0.1 to 100 s<sup>-1</sup>). To evaluate the recovery of HA-UPy and HA at 10 wt%, step-strain measurements  
401 were recorded at 1 rad/s with a range of consecutive strains (1%, 100%, 1%, 1000%, and 1%)

402 applied each for 180 s. To examine hysteresis of HA-UPy, 6 cycles of alternative low (1%) and  
403 high (500%) strain were applied. All samples were measured in triplicate.

404

405 ***Injectability of HA-UPy molecules:*** 10 wt% HA-UPy molecules were generated in PBS, loaded  
406 into a Hamilton syringe, and extruded into different shapes through a 26G needle.

407

408 ***Self-healing of HA-UPy molecules:*** To examine the self-healing phenomenon, hydrogel pieces  
409 were generated from HA-UPy (10 wt% and colored differently for visualization). Several pieces  
410 of the hydrogel were gently brought into contact with one another.

411

412 ***Enzymatic degradation:*** The stability of HA-UPy was evaluated in the presence of hyaluronidase  
413 (Sigma, Cat.# H3506).<sup>[21]</sup> In brief, HA-UPy and HA were dissolved in 20 mM sodium acetate  
414 buffered solution (pH 6) at 2.5 mg/mL supplemented with 1 kU/mL hyaluronidase. Each sample  
415 was sealed in a benzoylated dialysis membrane (MWCO ~ 2 kDa; Sigma, Cat.# D2272) and  
416 dialyzed against sodium acetate buffer at 37°C for 48 h. The dialysate containing the degradation  
417 products was collected for uronic acid assay. The solution was mixed with 12.5 mM sodium  
418 tetraborate (Alfa Aesar, Cat.# A16176) in concentrated sulfuric acid at a volume ratio of 1:6 and  
419 heated at 100°C for 10 mins. Upon cooling, 0.15% m-hydroxydiphenyl (Sigma, Cat.# 262250) in  
420 0.5% NaOH was added and its absorbance was measured at 520 nm using UV/vis spectroscopy.  
421 Known concentrations of HA (0 – 2.5 mg/mL) were used to generate the standard curve.

422

423 ***Free radical scavenging:*** The ability of HA-UPy to scavenge free radicals was analyzed by using  
424 1,1-diphenyl-2-picrylhydrazyl (DPPH; Sigma, Cat.# D9132) or Fenton reagent as free radical



425 sources.<sup>[16]</sup> For the DPPH assay, 10 wt% HA-UPy or HA was fully soaked in ethanol containing  
426 0.1 mM DPPH at 37°C for 1 h in the dark. Saline of the same volume was used as the control. The  
427 absorbance of DPPH solution at 517 nm before ( $Abs_0$ ) and after ( $Abs_t$ ) the incubation was recorded  
428 using UV/vis. The DPPH scavenging effect was determined as  $\frac{Abs_0 - Abs_t}{Abs_0} \times 100\%$ . The average  
429 reduction in absorbance in the saline group was subtracted from the HA and HA-UPy groups to  
430 normalize for dilution. All samples were measured in triplicate.

431  
432 To examine the hydroxyl radical scavenging effect, the Fenton reagent was prepared as described  
433 elsewhere.<sup>[31]</sup> Briefly, a reaction mixture consisting of 1 mM ferric chloride (Sigma, Cat.#  
434 157740), 30 mM deoxyribose (Sigma, Cat.# 121649), 1 mM ascorbic acid (Sigma, Cat.# A92902),  
435 1 mM EDTA (Sigma, Cat.# E9884) and 20 mM H<sub>2</sub>O<sub>2</sub> was prepared in 0.2 M phosphate buffer. 1  
436 mL of the reaction mixture was added to either 100 μL of 10 wt% HA-UPy or 0.2 M phosphate  
437 buffer (control). The gel or phosphate buffer were incubated at room temperature for 1 h on a  
438 shaker plate. Following the incubation period, 500 μL of the reaction mixture was taken from each  
439 tube and mixed with 500 μL of a solution of 0.25% thiobarbituric acid (TBA; Sigma, Cat.# T5500)  
440 in 15% trichloroacetic acid (TCA; Sigma, Cat.# T6399). The mixtures were incubated in a silicon  
441 oil bath at 100°C for 20 min. The absorbance was measured at 532 nm using a UV/Vis  
442 spectrophotometer, with a lower absorbance corresponding to fewer hydroxyl radicals. All samples  
443 were measured in triplicate.

444  
445 Following exposure to the Fenton reaction mixture, the samples were washed in PBS, freeze dried,  
446 and reconstituted in saline at a concentration of 10 wt%. Corresponding HA-UPy samples were  
447 similarly incubated in phosphate buffer alone (controls), followed by washing in PBS, freeze

448 drying, and reconstituting in saline. A frequency sweep was performed as previously described at  
449 1% strain under oscillatory mode with frequency varying from 0.1 to 10 Hz. The storage moduli  
450 ( $G'$ ) at 1 Hz was compared for the free radical-treated HA-UPy and corresponding HA-UPy  
451 control.

452

453 ***Explant coculture:*** To examine the biocompatibility of HA-UPy, rat tibial condyles were  
454 harvested and cultured in chondrocyte medium with or without HA-UPy (10 wt%, 50  $\mu$ L) for 7 d.  
455 The cartilage explants were then rinsed and incubated in PBS containing 0.05% calcein  
456 acetoxymethyl and 0.2% ethidium homodimer-1 from the Live/Dead Cell Viability Assays kit  
457 (Life technologies, Cat.# L3224) for 30 min. After thorough washing, the explants were sectioned  
458 and imaged using a Keyence (BZ-X710) microscope.

459

460 ***Coefficient of friction between cartilage explants:*** Two flat cartilage discs (8-mm diameter and  
461 0.5-mm thickness, porcine, 3-year-old) were mounted on sandpaper-covered parallel plates using  
462 cyanoacrylate glue, with the articular surfaces facing each other. After equilibration in saline, HA,  
463 HA-UPy (10 wt%), or saline was introduced at the cartilage-cartilage interface, the discs were  
464 brought into contact and programmed to move against each other by using a rotational rheometer.  
465 Both normal stress and shear stress were recorded under shear rates ranging from 0.1 to 1  $s^{-1}$ . The  
466 coefficient of friction ( $\mu$ ) at the cartilage-cartilage interface was calculated using the equation,  $\mu =$

467 
$$\frac{\text{Shear stress}}{\text{Normal stress}}$$

468

469 ***ACL injury models:*** All animal studies were approved by the Institutional Animal Care and Use  
470 Committee at Duke University in compliance with NIH guidelines for laboratory animal care. Both

471 female mice (C57BL/6J, 3-month-old, Jackson Lab) and rats (Lewis, 3-month-old, Charles River)  
472 were used for unilateral anterior cruciate ligament transection (ACLT). Each animal was sedated  
473 using 2% isoflurane and injected with buprenorphine (1 mg/kg, sustained release, ZooPharm) as  
474 an analgesic prior to surgery.

475 For ACLT in mouse, each animal was placed in a supine position with the left hindlimb bent over  
476 a triangular cradle. After shaving and disinfecting the skin, a cut less than 0.5-cm-long was created  
477 from the medial side to expose the joint capsule. The ACL was fully extended by bending the knee  
478 to 90°C and transected using spring scissors (FST, Cat.# 15004-08). Bupivacaine (0.5%, Hospira)  
479 was then applied topically, and the incision was closed with Vicryl 5-0 sutures.

480 For mi-ACLT in rat, the left hindlimb was disinfected and flexed to approximately a 90° angle.  
481 An 18G needle was inserted perpendicularly into the joint on the lateral side of the patellar  
482 ligament, and the bevel of the needle was used to transect the ACL. To confirm the completion of  
483 ACLT, the clinical anterior drawer test was performed. In the anterior drawer test, the tibia easily  
484 moved out of the normal range of motion when pressure was applied behind the tibia while the  
485 femur was held in place.

486 Following surgery, animals were placed on heating pads to aid in recovery from anesthesia and  
487 left unconstrained in cages.

488

489 ***Intra-articular injections:*** Sterile saline, HA (200 kDa, 10 wt% in saline), and HA-UPy (200 kDa,  
490 10 wt% in saline) were prepared fresh and injected into the injured joints using a Hamilton syringe  
491 fitted with 26G needle. Animals were randomized to treatment groups following surgery. For  
492 mouse, injections were started one week following ACLT and performed weekly for four weeks

493 with 5  $\mu$ L of sample injected each time. For rat, injections were started one day following mi-  
494 ACLT and repeated weekly for another eight weeks with 50  $\mu$ L of sample injected each time. One  
495 week after the last injection, animals were euthanized.

496

497 **IVIS imaging:** Calibration studies with varying extent of Cy7 modified HA molecules were  
498 carried out to identify optimal Cy7 concentration required to obtain the optical intensity. 50  $\mu$ L of  
499 Cy7-containing HA or HA-UPy (10 wt%) was administered into the rat joint via intra-articular  
500 injection. At designated times after injection, rats were anesthetized under isoflurane inhalation  
501 and imaged by using an IVIS Kinetics system (excitation filter, 745 nm; emission filter, ICG;  
502 excitation time, 100 ms). The epi-fluorescence intensity of Cy7 in the joint was quantified by  
503 selecting an ROI from images taken at Day 0. The percent of initial fluorescence intensity was  
504 calculated after measuring the fluorescence intensity at each subsequent time point.

505

506 **Histological analysis:** Fixed joint samples were decalcified in 14% EDTA (pH 8.0, Sigma, Cat.#  
507 E5134) for 2–3 weeks, rinsed with PBS, dehydrated, and embedded in paraffin blocks, and sliced  
508 into 8  $\mu$ m-thick sections using a Leica rotary microtome. Each section was deparaffinized in  
509 CitriSolv (Decon Labs, Cat.# 1601) and rehydrated through graded alcohols and deionized water.  
510 For Safranin-O staining, the rehydrated sections were incubated in 1% Safranin-O (Sigma, Cat.#  
511 S8884) for 30 min for mouse cartilage sections and 1 h for rat cartilage sections. They were  
512 counter-stained with 0.02% Fast Green (Sigma, Cat.# F7258) for 1 min for mouse and 1.5 min for  
513 rat, followed by incubating in hematoxylin solution (Ricca Chemical, Cat.# 3536-16) for 1 min for  
514 mouse and 5 min for rat. The stained sections were rinsed, dehydrated, and covered with a

515 mounting medium (Fisher Scientific, Cat.# SP15-100). Images were taken using a Keyence  
516 microscope.

517

518 **OARSI scoring:** Scoring of Safranin O-stained sagittal sections was performed by three blinded  
519 scorers in accordance with the OARSI histopathology initiative for evaluation of OA in mouse<sup>[32]</sup>  
520 and rat.<sup>[25]</sup> Scoring criteria for the mouse included the degree of degeneration of cartilage in both  
521 the tibia and femur, evaluated from 0-6: 0 means normal; 0.5 has loss of proteoglycan without  
522 structural changes; 1 shows limited fibrillation on the cartilage surface; 2 presents vertical clefts;  
523 3 means vertical clefts or erosion covering <25% of surface area; 4 for 25–50% area being affected;  
524 5 for 50–75%; and 6 for >75%. Scoring criteria for the rat included total tibial cartilage  
525 degeneration (0-5 for 3 zones, total 0-15), femoral cartilage degeneration (0-5), bone score (0-5),  
526 and osteophyte score (0-4), with total added score from 0-29. The osteophyte score was modified  
527 for sagittal joint sections based upon a histogram of osteophyte sizes for all samples in the mi-  
528 ACLT groups. ImageJ was used to quantify total cartilage degeneration, significant cartilage  
529 degeneration, and surface matrix loss (all expressed as the percentage of total cartilage width), as  
530 well as depth ratio of cartilage lesions (expressed as the depth of degenerated cartilage to the  
531 thickness of total cartilage). These measurements were completed for both the tibia and femur, the  
532 latter of which is a modification of the original scoring which only examines the tibia. A total of  
533 four sections, taken from two locations within the medial compartment of the joint, were evaluated.  
534 These four scores/measurements were averaged as technical replicates for each subject.

535

536 **Immunohistochemical analysis:** Immunohistochemical staining was used to detect MMP-13 and  
537 ADAMTS-5 expression in cartilage. Briefly, deparaffinized sections were subjected to heat-

538 induced antigen retrieval in a vegetable steamer for 13 min and permeabilized with 0.1% Triton  
539 X-100 for 15 min. Tissue sections were blocked with 0.1% BSA and 0.26 M glycerol in TBS for  
540 1 h, sequentially exposed to Dual Endogenous Enzyme Block (Dako, Cat.# S2003) for 30 min,  
541 and 5% and 1.5% normal goat serum for 30 min and 1 h, respectively, before incubation at 4°C  
542 overnight with either anti-MMP13 (dilution 1:500, Abcam, Cat.# ab39012) or anti-ADAMTS5  
543 (dilution 1:100, Abcam, Cat.# ab41037). VECTASTAIN® Elite ABC HRP Kit (Vector  
544 Laboratories, Cat.# PK-6100) kit and ImmPACT® DAB Peroxidase Substrate (Vector  
545 Laboratories, Cat.# SK-4105) were used to visualize the enzyme expression.

546  
547 **Statistical analysis:** The means with standard error of mean ( $n \geq 3$ ) are presented in the results.  
548 All animal studies included at least 6 animals per group. All the data were subjected to two-tailed  
549 Student's t-test, one-way analysis of variance (ANOVA) with post-hoc Tukey's multiple  
550 comparisons test, or two-way repeated measures ANOVA with Tukey's multiple comparisons test  
551 using GraphPad Prism 8. Any p-value of less than 0.05 was indicated with an asterisk and was  
552 considered statistically significant. All experiments were reproduced independently.

553  
554  
555  
556

## 557 **References**

- 558  
559 [1] B. A. Hills, *P I Mech Eng H* **2000**, 214, 83.  
560 [2] a) R. C. Gupta, R. Lall, A. Srivastava, A. Sinha, *Front Vet Sci* **2019**, 6, 192; b) M. K.  
561 Cowman, T. A. Schmidt, P. Raghavan, A. Stecco, *F1000Res* **2015**, 4, 622.  
562 [3] a) C. T. Stafford, W. Niedermeier, H. L. Holley, W. Pigman, *Annals of the rheumatic*  
563 *diseases* **1964**, 23, 152; b) E. A. Balazs, D. Watson, I. F. Duff, S. Roseman, *Arthritis &*  
564 *Rheumatism* **1967**, 10, 357.  
565 [4] a) A. Huynh, R. Priefer, *Carbohydr Res* **2020**, 489, 107950; b) E. Maheu, F. Rannou, J. Y.  
566 Reginster, *Semin Arthritis Rheum* **2016**, 45, S28.

- 567 [5] a) A. Fakhari, C. Berklund, *Acta Biomater* **2013**, 9, 7081; b) E. Trabucchi, S. Pallotta, M.  
568 Morini, F. Corsi, R. Franceschini, A. Casiraghi, A. Pravettoni, D. Foschi, P. Minghetti, *Int J*  
569 *Tissue React* **2002**, 24, 65; c) L. W. Moreland, *Arthritis Res Ther* **2003**, 5, 54.
- 570 [6] a) C. H. Evans, V. B. Kraus, L. A. Setton, *Nature Reviews Rheumatology* **2014**, 10, 11; b) S.  
571 Bowman, M. E. Awad, M. W. Hamrick, M. Hunter, S. Fulzele, *Clin Transl Med* **2018**, 7, 6.
- 572 [7] a) A. Singh, M. Corvelli, S. A. Unterman, K. A. Wepasnick, P. McDonnell, J. H. Elisseeff,  
573 *Nature Materials* **2014**, 13, 988; b) H. J. Faust, S. D. Sommerfeld, S. Rathod, A.  
574 Rittenbach, S. R. Banerjee, B. M. Tsui, M. Pomper, M. L. Amzel, A. Singh, J. H. Elisseeff,  
575 *Biomaterials* **2018**, 183, 93; c) F. A. Maulvi, T. G. Soni, D. O. Shah, *Journal of Biomaterials*  
576 *Science, Polymer Edition* **2015**, 26, 1035; d) R. Salzillo, C. Schiraldi, L. Corsuto, A.  
577 D'Agostino, R. Filosa, M. De Rosa, A. La Gatta, *Carbohydrate polymers* **2016**, 153, 275.
- 578 [8] K. Yoshioka, M. Katayama, T. Nishiyama, K. Harada, S. Takeshita, Y. Kawamata, *BMC*  
579 *Musculoskelet Disord* **2019**, 20, 424.
- 580 [9] V. M. Goldberg, R. D. Coutts, *Clin Orthop Relat Res* **2004**, DOI: 10.1097/00003086-  
581 200402000-00021130.
- 582 [10] R. P. Sijbesma, F. H. Beijer, L. Brunsveld, B. J. B. Folmer, J. H. K. K. Hirschberg, R. F. M.  
583 Lange, J. K. L. Lowe, E. W. Meijer, *Science* **1997**, 278, 1601.
- 584 [11] a) P. Y. W. Dankers, E. N. M. van Leeuwen, G. M. L. van Gemert, A. J. H. Spiering, M. C.  
585 Harmsen, L. A. Brouwer, H. M. Janssen, A. W. Bosman, M. J. A. van Luyn, E. W. Meijer,  
586 *Biomaterials* **2006**, 27, 5490; b) P. Y. Dankers, T. M. Hermans, T. W. Baughman, Y.  
587 Kamikawa, R. E. Kieltyka, M. M. Bastings, H. M. Janssen, N. A. Sommerdijk, A. Larsen, M.  
588 J. Van Luyn, *Advanced materials* **2012**, 24, 2703; c) Y. Wu, L. Wang, X. Zhao, S. Hou, B.  
589 Guo, P. X. Ma, *Biomaterials* **2016**, 104, 18; d) M. J. G. Schotman, M. M. C. Peters, G. C.  
590 Krijger, I. van Adrichem, R. de Roos, J. L. M. Bemelmans, M. J. Pouderoijen, M. G. T. A.  
591 Rutten, K. Neef, S. A. J. Chamuleau, P. Y. W. Dankers, *Advanced Healthcare Materials*  
592 **2021**, n/a, 2001987.
- 593 [12] a) F. H. Beijer, R. P. Sijbesma, H. Kooijman, A. L. Spek, E. W. Meijer, *Journal of the*  
594 *American Chemical Society* **1998**, 120, 6761; b) M. Guo, L. M. Pitet, H. M. Wyss, M. Vos,  
595 P. Y. W. Dankers, E. W. Meijer, *Journal of the American Chemical Society* **2014**, 136,  
596 6969.
- 597 [13] D. A. Gibbs, E. W. Merrill, K. A. Smith, E. A. Balazs, *Biopolymers* **1968**, 6, 777.
- 598 [14] J. Nilsson, A. Thorstensson, *Acta Physiologica Scandinavica* **1987**, 129, 107.
- 599 [15] A. Phadke, C. Zhang, B. Arman, C.-C. Hsu, R. A. Mashelkar, A. K. Lele, M. J. Tauber, G.  
600 Arya, S. Varghese, *Proceedings of the National Academy of Sciences* **2012**, 109, 4383.
- 601 [16] a) J. Qu, X. Zhao, Y. P. Liang, T. L. Zhang, P. X. Ma, B. L. Guo, *Biomaterials* **2018**, 183, 185;  
602 b) J. M. Gutteridge, B. Halliwell, *Biochem J* **1988**, 253, 932.
- 603 [17] D. Presti, J. E. Scott, *Cell Biochem Funct* **1994**, 12, 281.
- 604 [18] T. Bano, N. Kumar, R. Dudhe, *Org Med Chem Lett* **2012**, 2, 34.
- 605 [19] P. J. Coleman, D. Scott, R. M. Mason, J. R. Levick, *J Physiol* **1999**, 514 ( Pt 1), 265.
- 606 [20] a) C. Aulin, P. Lundback, K. Palmblad, L. Klareskog, H. E. Harris, *Osteoarthritis and*  
607 *Cartilage* **2017**, 25, 157; b) S. Elmorsy, T. Funakoshi, F. Sasazawa, M. Todoh, S. Tadano,  
608 N. Iwasaki, *Osteoarthritis and Cartilage* **2014**, 22, 121.
- 609 [21] H. Kabra, Y. Hwang, H. L. Lim, M. Kar, G. Arya, S. Varghese, *ACS biomaterials science &*  
610 *engineering* **2015**, 1, 7.

- 611 [22] M. Wathier, B. A. Lakin, P. N. Bansal, S. S. Stoddart, B. D. Snyder, M. W. Grinstaff, *Journal*  
612 *of the American Chemical Society* **2013**, 135, 4930.
- 613 [23] a) T. Hayami, M. Pickarski, Y. Zhuo, G. A. Wesolowski, G. A. Rodan, L. T. Duong, *Bone*  
614 **2006**, 38, 234; b) S. Kamekura, K. Hoshi, T. Shimoaka, U. Chung, H. Chikuda, T. Yamada,  
615 M. Uchida, N. Ogata, A. Seichi, K. Nakamura, H. Kawaguchi, *Osteoarthritis and Cartilage*  
616 **2005**, 13, 632.
- 617 [24] a) M. Ikeuchi, M. Izumi, K. Aso, N. Sugimura, T. Kato, T. Tani, *Eur J Pain* **2015**, 19, 334; b)  
618 E. Teeple, K. A. Elsaid, G. D. Jay, L. Zhang, G. J. Badger, M. Akelman, T. F. Bliss, B. C.  
619 Fleming, *Am J Sports Med* **2011**, 39, 164.
- 620 [25] N. Gerwin, A. M. Bendele, S. Glasson, C. S. Carlson, *Osteoarthritis and Cartilage* **2010**,  
621 18, S24.
- 622 [26] a) M. B. Goldring, M. Otero, *Curr Opin Rheumatol* **2011**, 23, 471; b) M. Wang, E. R.  
623 Sampson, H. Jin, J. Li, Q. H. Ke, H. J. Im, D. Chen, *Arthritis Res Ther* **2013**, 15, R5; c) S. S.  
624 Glasson, R. Askew, B. Sheppard, B. Carito, T. Blanchet, H.-L. Ma, C. R. Flannery, D.  
625 Peluso, K. Kanki, Z. Yang, M. K. Majumdar, E. A. Morris, *Nature* **2005**, 434, 644; d) F.  
626 Echtermeyer, J. Bertrand, R. Dreier, I. Meinecke, K. Neugebauer, M. Fuerst, Y. J. Lee, Y.  
627 W. Song, C. Herzog, G. Theilmeier, T. Pap, *Nat Med* **2009**, 15, 1072.
- 628 [27] M. K. Lotz, S. Otsuki, S. P. Grogan, R. Sah, R. Terkeltaub, D. D'Lima, *Arthritis Rheum* **2010**,  
629 62, 2206.
- 630 [28] T. Maerz, M. D. Newton, M. D. Kurdziel, P. Altman, K. Anderson, H. W. Matthew, K. C.  
631 Baker, *Osteoarthritis Cartilage* **2016**, 24, 1918.
- 632 [29] E. G. Sutter, B. Liu, G. M. Utturkar, M. R. Widmyer, C. E. Spritzer, H. C. Cutcliffe, Z. A.  
633 Englander, A. P. Goode, W. E. Garrett, Jr., L. E. DeFrate, *Am J Sports Med* **2019**, 47, 96.
- 634 [30] S. Hou, X. Wang, S. Park, X. Jin, P. X. Ma, *Advanced Healthcare Materials* **2015**, 4, 1491.
- 635 [31] R. Komeri, F. G. Thankam, J. Muthu, *Materials Science and Engineering: C* **2017**, 71, 100.
- 636 [32] S. S. Glasson, M. G. Chambers, W. B. Van Den Berg, C. B. Little, *Osteoarthritis Cartilage*  
637 **2010**, 18 Suppl 3, S17.

638  
639  
640

## 641 **Supplementary Information**

642 Supplementary Figures 1-12

643 Supplementary Text

644 Supplementary Methods

645

## 646 **Acknowledgments**

647 We thank H Newman, S Sharma, and N Sangaj for helping the with the blinded OARSI scoring.

648 This material is based upon work partially supported by the National Science Foundation Graduate



649 Research Fellowship Program (A Gilpin) under Grant No. DGE 1644868. This work was partially  
650 supported by the Duke University and National Institute of Arthritis and Musculoskeletal and Skin  
651 Diseases (NIAMS) of the National Institutes of Health (NIH) under Award Number NIH R01  
652 AR063184. The content is solely the responsibility of the authors and does not necessarily  
653 represent the official views of the funding agencies.

654

#### 655 **Author contributions**

656 S.V conceived the initial idea. A.G., Y.Z., and S.V. designed the study and wrote the manuscript.  
657 A.G., Y.Z., and J.H. designed and performed experiments and analyzed the data. J.H.R performed/  
658 helped with synthesis. Y.Y and Y.Z performed the mouse studies. W.E performed/helped with the  
659 rat ACL injuries. S.Z helped with the rheological measurements. All authors were involved in the  
660 manuscript preparation

661

#### 662 **Competing interests**

663 The authors declare no competing interests.

664

665
